# Supplementary material
Source: PubMed Central journal article supplement (PMC514372)

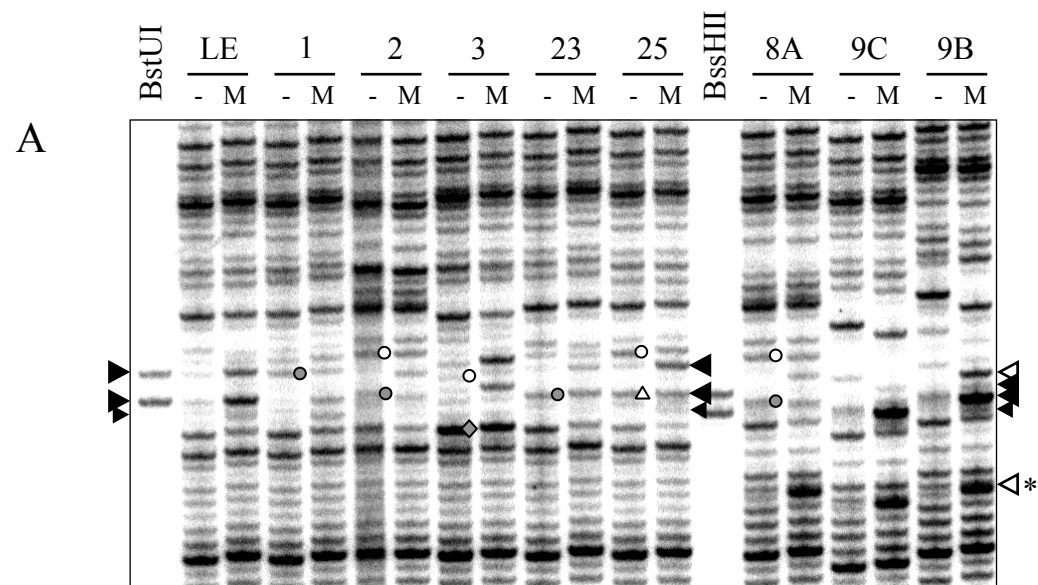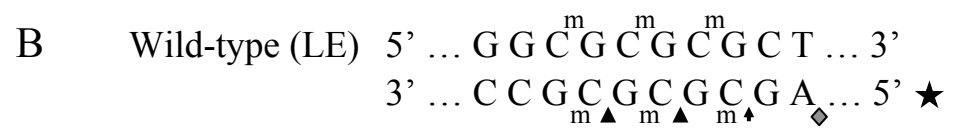

Figure S1

Watson

Crick

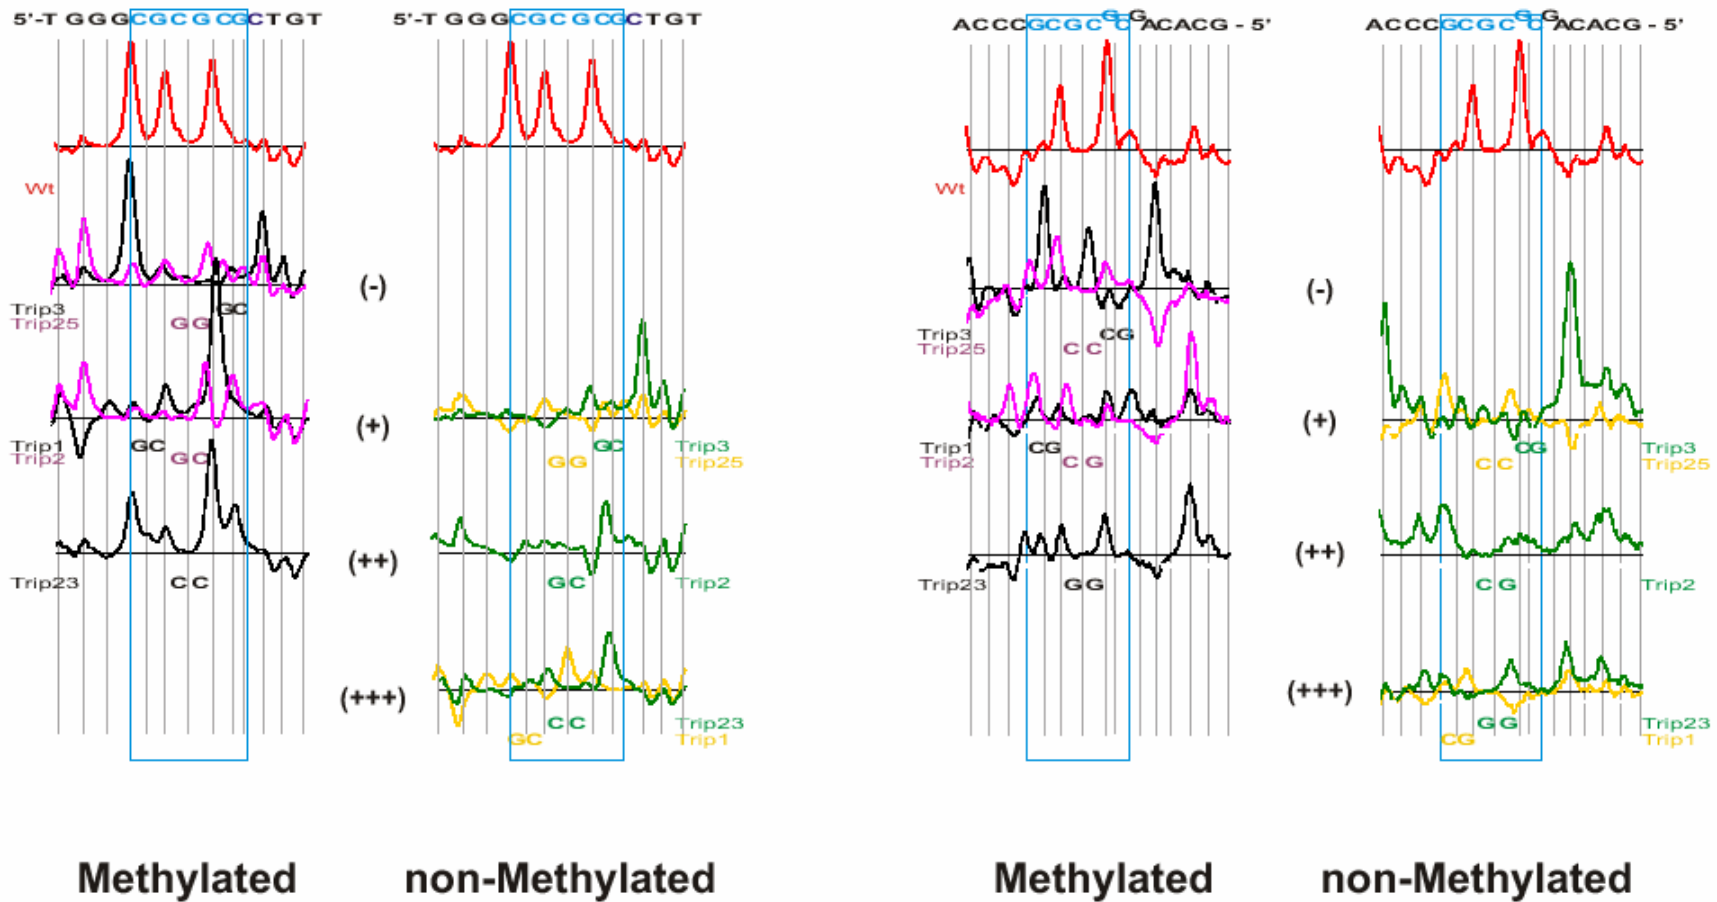

Figure S2

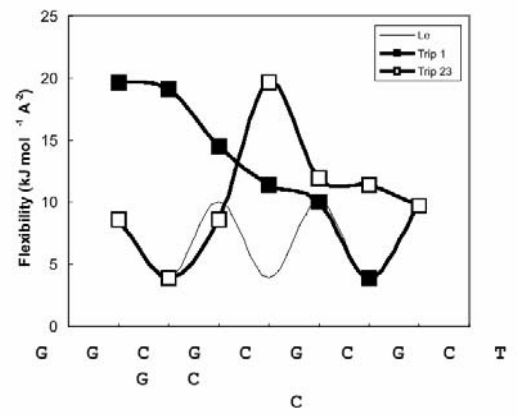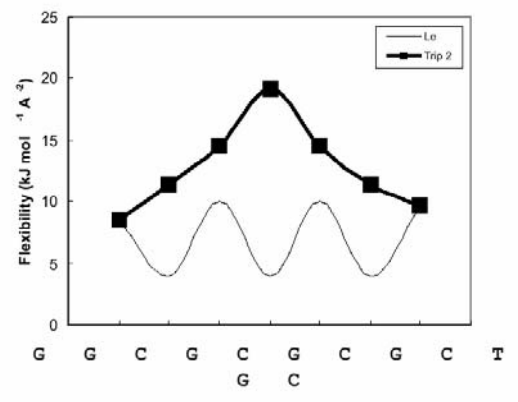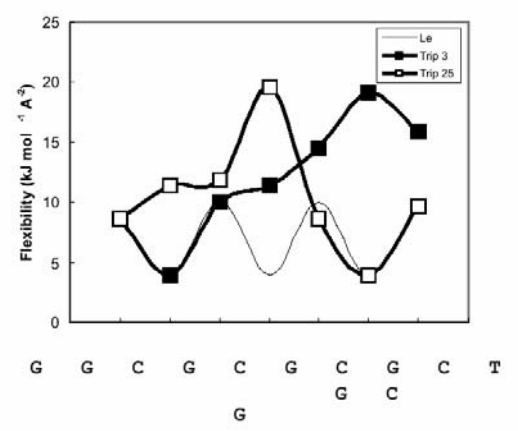

Figure S3

Supplement: nar_32_14_4322__1.pdf [file nar_32_14_4322__1.pdf]
